# Supplementary material for: Identification of Potential Pathways of Morella cerifera Seedlings in Response to Alkali Stress via Transcriptomic Analysis
Source: MDPI journal article supplement (doi:10.3390/plants11081053), 2022-04-12
Supplement: s1 [file s1]

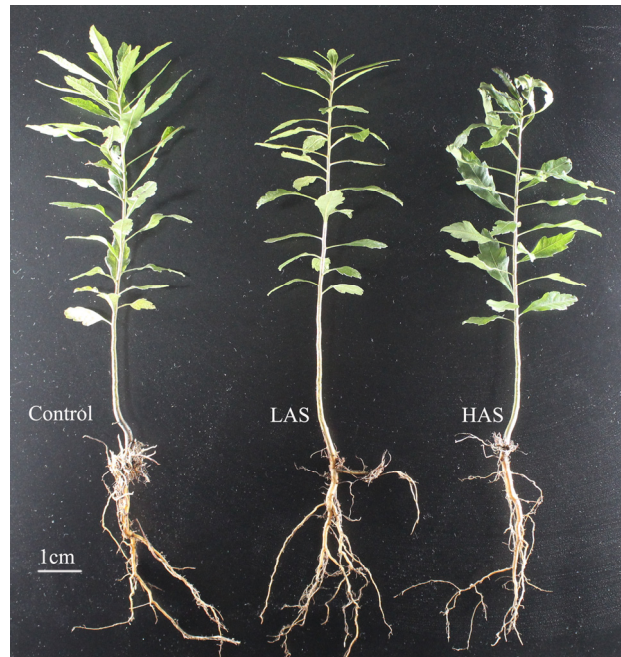

**Figure S1.** Morphological changes in leaves of *M. cerifera* after 24-h alkali stress treatment (control, LAS, and HAS).

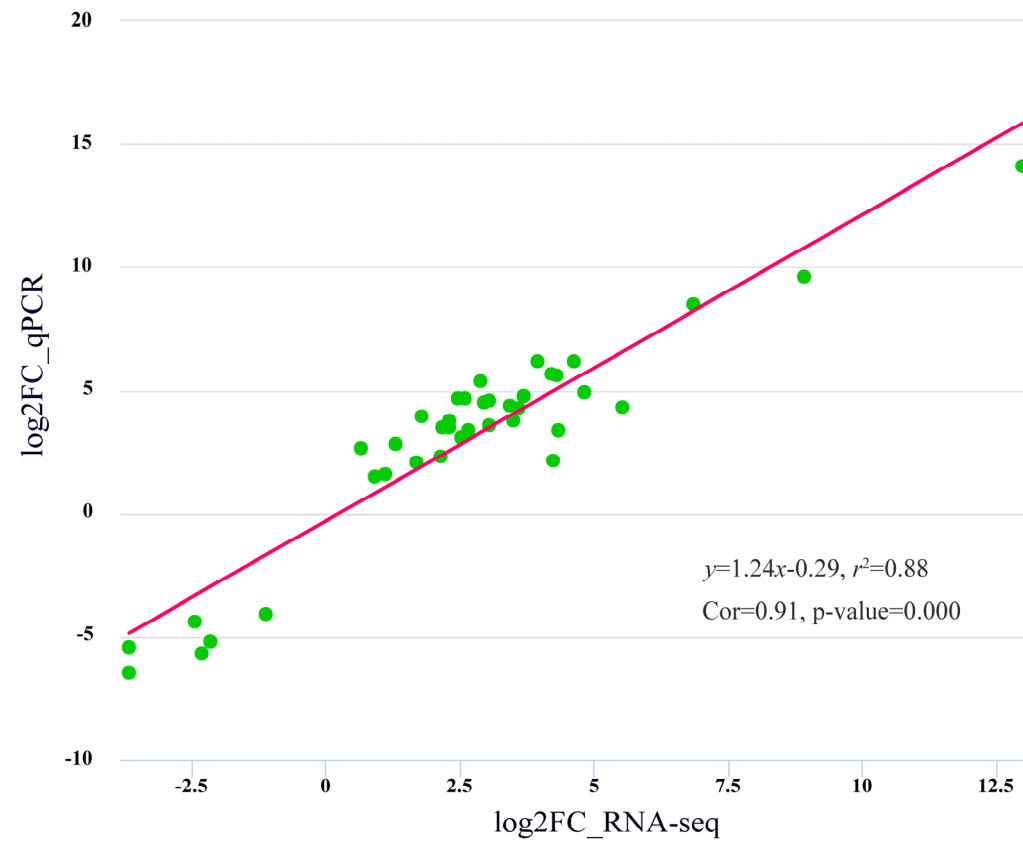

**Figure S2.** The correlation between the gene expression results obtained through qRT-PCR (20 key DEGs, shown in Figure 6) and those obtained through RNA-seq, which can be calculated as the Pearson correlation coefficient (Cor) and the squared multiple correlation coefficient ( $r^2$ ).

**Table S1.** The primers for reverse transcription-quantitative PCR (RT-qPCR) of the genes. The key genes involved in the abiotic stress pathway of *Morella cerifera* with alkali stress.

| Gene code      | Primer Sequence (5'→3')   | Target gene description                                                                            | Locus ID*   |
|----------------|---------------------------|----------------------------------------------------------------------------------------------------|-------------|
| KAB1207809.1-F | TTGGACGGAGCTGATTGGAT      | Hormone metabolism.auxin.synthesis-degradation. Encodes a UDP-glucose:thiohydroximate              | AT1G24100.1 |
| KAB1207809.1-R | GTAAGCCGATGGCACCATTG      | S-glucosyltransferase                                                                              |             |
| KAB1222596.1-F | CGAAGACTGCAGACCCAAAAG     | Hormone metabolism.abscisic acid.synthesis-degradation.synthesis.9-cis-epoxycarotenoid dioxygenase | AT1G30100.1 |
| KAB1222596.1-R | GGTAGACGCCGTTGATGCAT      |                                                                                                    |             |
| KAB1209307.1-F | TCGGGAAGCAACGGATGA        | Hormone metabolism.ethylene.synthesis-degradation.1-aminocyclopropane-1-carboxylate oxidase        | AT2G19590.1 |
| KAB1209307.1-R | CTCCCGAGAATGCTTCCA        |                                                                                                    |             |
| KAB1201917.1-F | GGAGGACGAATGGTGCTGAT      | Hormone metabolism.salicylic acid.synthesis-degradation                                            | AT4G36470.1 |
| KAB1201917.1-R | TTCTCCCTTCGAAACCAATTTG    |                                                                                                    |             |
| KAB1210918.1-F | GCTTGCCGCTAGGAATGCT       | Hormone metabolism.jasmonate.synthesis-degradation.12-Oxo-PDA-reductase                            | AT1G76690.1 |
| KAB1210918.1-R | CCGTATTGGTCTGTTCTATCATTCA |                                                                                                    |             |
| KAB1201300.1-F | ATGGCAGTCATTGCACTCAAGT    | Cell wall.precursor synthesis.UDP-Glc dehydrogenase (UGD)                                          | AT3G29360.1 |
| KAB1201300.1-R | TTCTTCAAGACCCGGCTCAT      |                                                                                                    |             |
| KAB1224823.1-F | AAACAGGGCCATGTCCAGAA      | Cell wall.degradation.pectate lyases and polygalacturonases                                        | AT3G07970.1 |
| KAB1224823.1-R | GAATGCTCTCGCTACAATCGAA    |                                                                                                    |             |
| KAB1213853.1-F | TTTGAACAAGCAACAGATCGT     | Misc.beta 1,3 glucan hydrolases.glucan endo-1,3-beta-glucosidase                                   | AT2G27500.1 |
| KAB1213853.1-R | GTTGCCGAGCATTCCATAGC      |                                                                                                    |             |
| KAB1203206.1-F | TCTTCGGAGATGGTCCTTACGT    | Protein.degradation.aspartate protease                                                             | AT1G03220.1 |
| KAB1203206.1-R | AGGGCTCGCCTGCTATGTAG      |                                                                                                    |             |
| KAB1218271.1-F | CCACCACCTGCGAAAAG         | Protein.degradation.ubiquitin.E3.RING                                                              | AT1G53820.1 |
| KAB1218271.1-R | GCTCAAGCTCAGAGAGGCAAA     |                                                                                                    |             |
| KAB1201701.1-F | ACGAGCCCATGAAACCTTACTTT   | Stress.biotic.respiratory burst. NADPH/respiratory burst oxidase protein D (RbohD)                 | AT5G47910.1 |
| KAB1201701.1-R | GCGTAAATGCTATGGCCATCA     |                                                                                                    |             |

|                |                            |                                                                                                     |             |
|----------------|----------------------------|-----------------------------------------------------------------------------------------------------|-------------|
| KAB1218332.1-F | GCTCCTCGCATGGACACAGT       | Stress.biotic.signalling. JAZ6 transcript levels rise in response to a jasmonate stimulus and a GFP | AT1G72450.1 |
| KAB1218332.1-R | GGCAATAGCTTGTGGCTTTTG      |                                                                                                     |             |
| KAB1208615.1-F | GCCCTTATGGCGAGAACCTT       | Stress.biotic.PR-proteins. pathogenesis related protein                                             | AT2G14580.1 |
| KAB1208615.1-R | TGCCGCCAACACATGAATTA       |                                                                                                     |             |
| KAB1215386.1-F | TGGGTCTACTCGGCCTACCT       | Stress.abiotic.heat. Heat shock protein 83                                                          | AT5G52640.1 |
| KAB1215386.1-R | ACGTCCCTGGTGACAGTGAAA      |                                                                                                     |             |
| KAB1207134.1-F | TCTTGACGACACCGACGATTT      | Misc.peroxidases. Peroxidase superfamily protein                                                    | AT1G49570.1 |
| KAB1207134.1-R | GTGGCAGGACAAACTCTTTTCG     |                                                                                                     |             |
| KAB1211552.1-F | TACTGGCCTAGACGATGAGCAA     | Signalling.receptor kinases.Catharanthus roseus-like RLK1. Encodes a synergid-expressed             | AT3G51550.1 |
| KAB1211552.1-R | AAGCTCTCCGGCGCAATTA        |                                                                                                     |             |
| KAB1228300.1-F | TTGACCCAGTGACGGTCTTGTA     | Signalling.MAP kinases. member of MEKK subfamily                                                    | AT2G32510.1 |
| KAB1228300.1-R | CCTTGGGCTCCTCCTTAGG        |                                                                                                     |             |
| KAB1210753.1-F | AAGGCCCGTACGTTCTCATG       | RNA.regulation of transcription.AP2/EREBP, APETALA2/Ethylene-responsive element binding protein     | AT5G52020.1 |
| KAB1210753.1-R | TTGCGTGGTTCTCGTATTTTCG     | family                                                                                              |             |
| KAB1216919.1-F | ACGAATGGATTCACTGTTCGATTA   | RNA.regulation of transcription.MYB domain transcription factor family                              | AT1G79180.1 |
| KAB1216919.1-R | TCAACATCAGCCTCCAATGG       |                                                                                                     |             |
| KAB1215386.1-F | TTGGGTCTACTCGGCCTACCT      | Stress.abiotic.heat, Heat shock protein 83                                                          | AT5G52640.1 |
| KAB1215386.1-R | CGTCCCTGGTGACAGTGAAA       |                                                                                                     |             |
| Actin-F        | AATGGAAGTGAATGGTCAAGGC     |                                                                                                     |             |
| Actin-R        | TGCCAGATCTTCTCCATGTCATCCCA |                                                                                                     |             |

---

Note: Gene code and locus ID were derived from *Morella rubra* ‘Y2012-145’ ([https://www.ncbi.nlm.nih.gov/assembly/GCA\\_003952965.2](https://www.ncbi.nlm.nih.gov/assembly/GCA_003952965.2)) and *Arabidopsis thaliana* (TAIR10) (<https://www.arabidopsis.org/index.jsp>), respectively.
